# Supplementary material for: Analysis of Transcriptome and miRNAome in the Muscle of Bamei Pigs at Different Developmental Stages
Source: MDPI journal article supplement (doi:10.3390/ani10071198), 2020-07-15

A

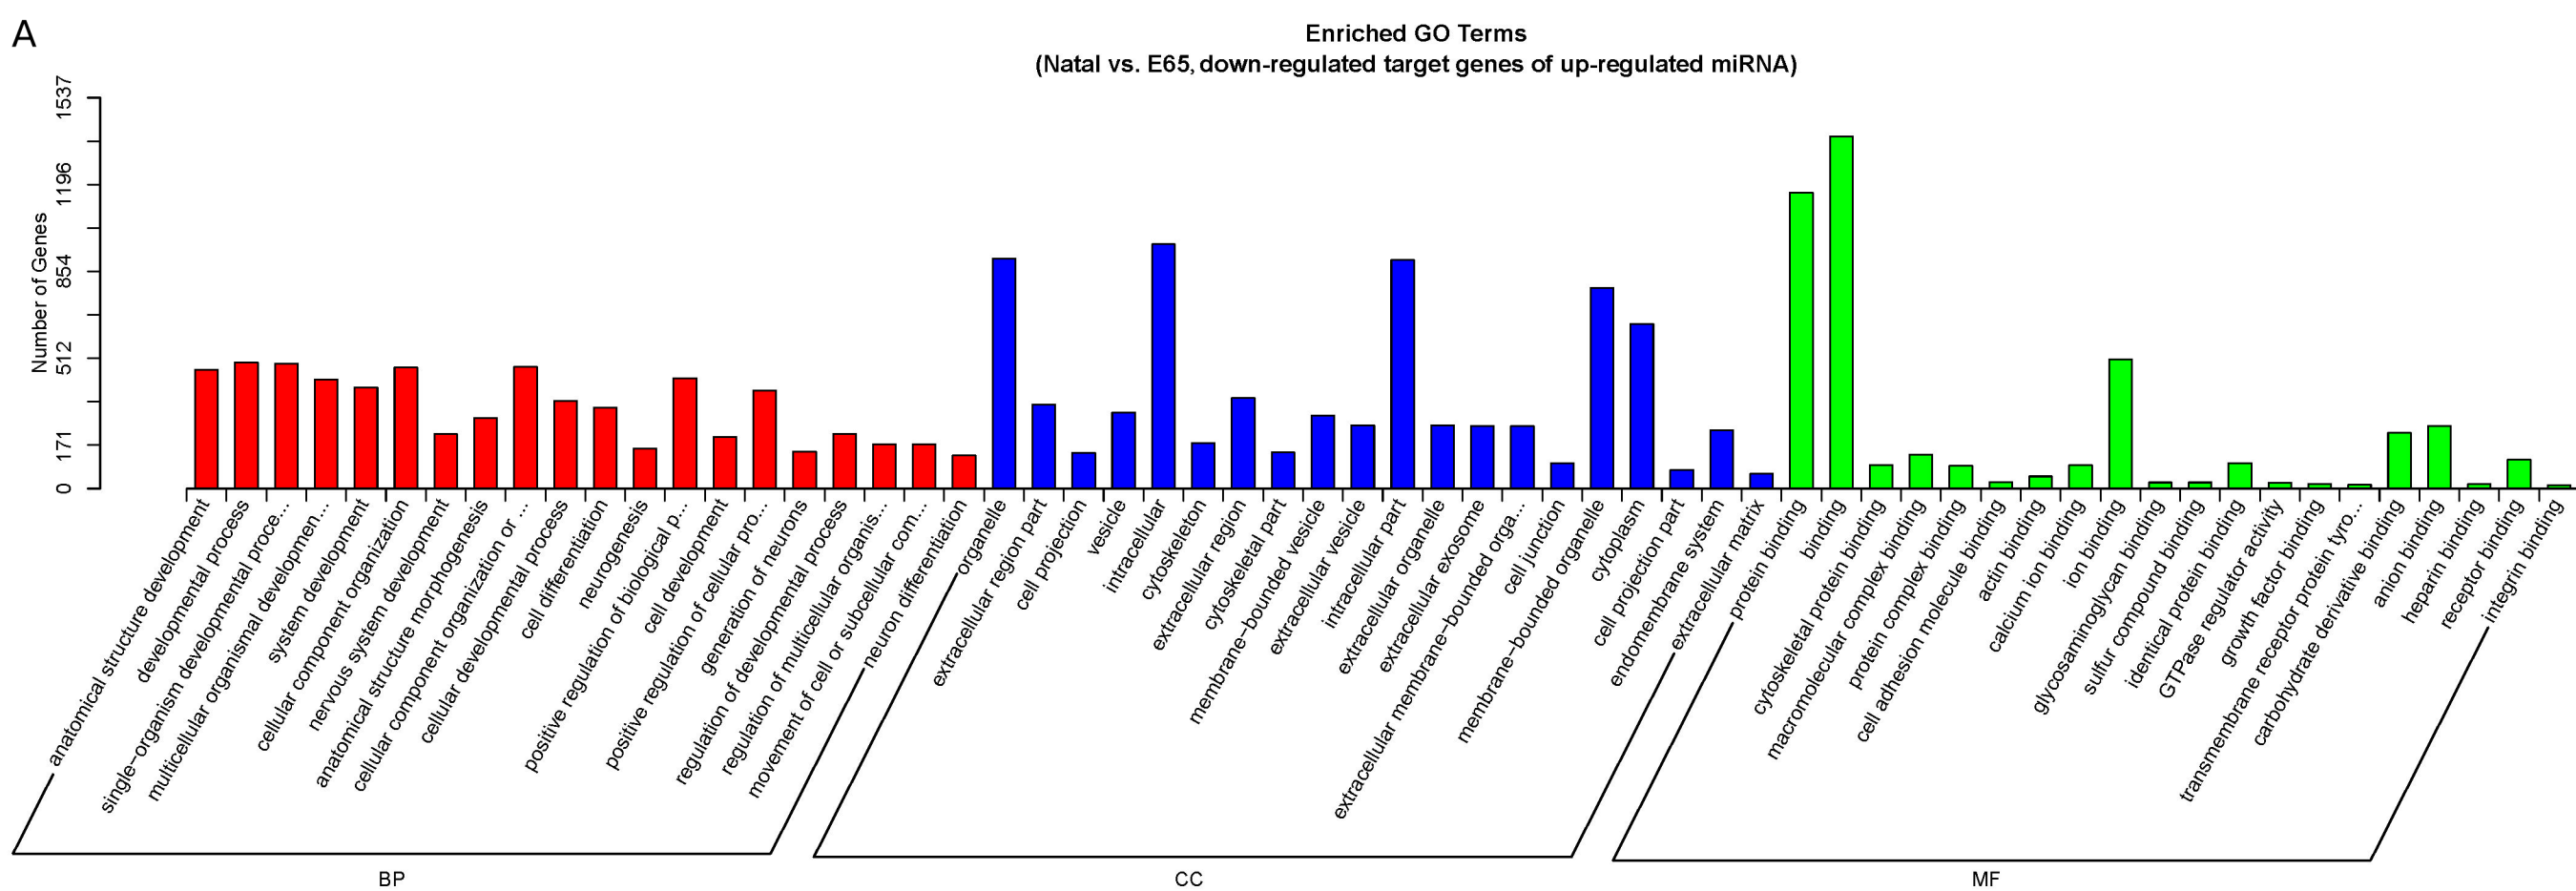

B

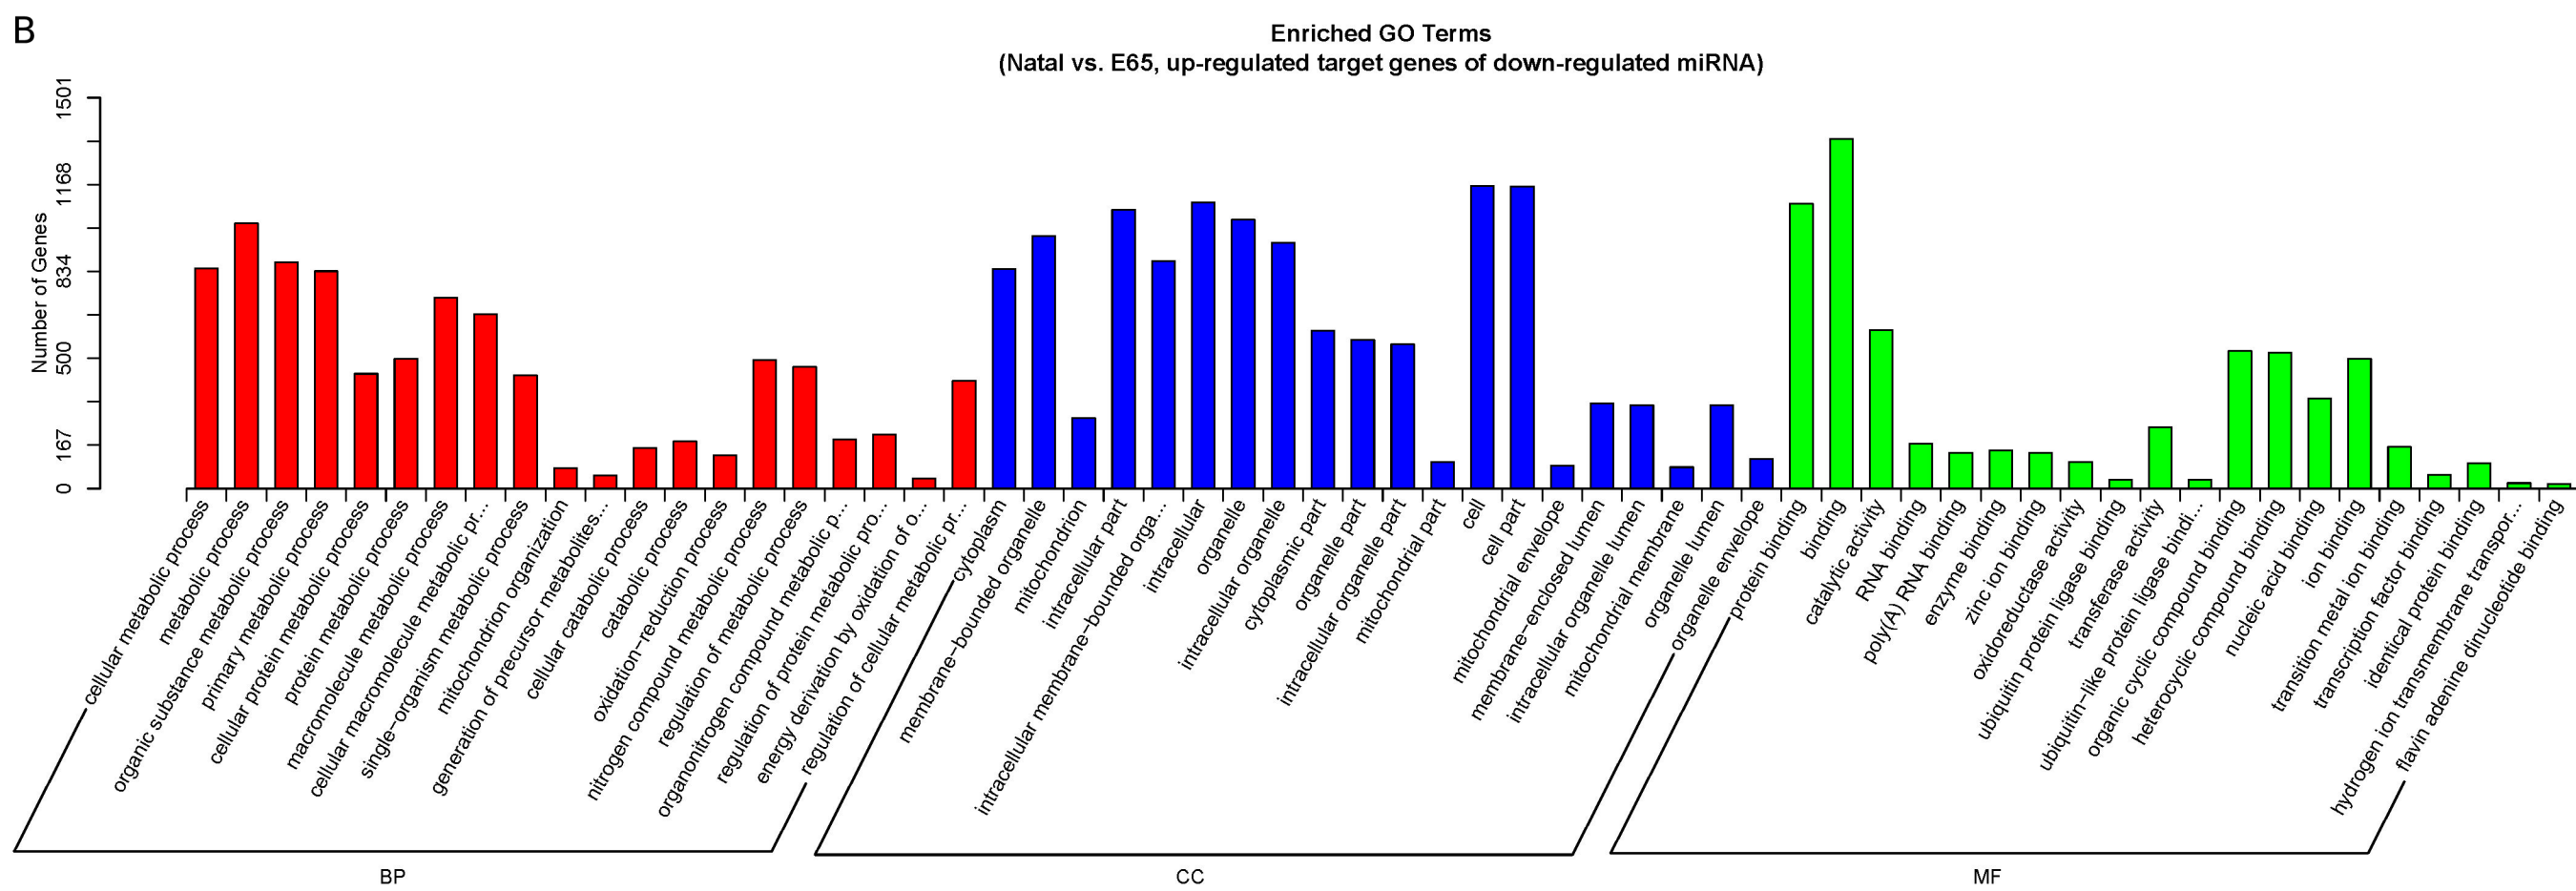

C

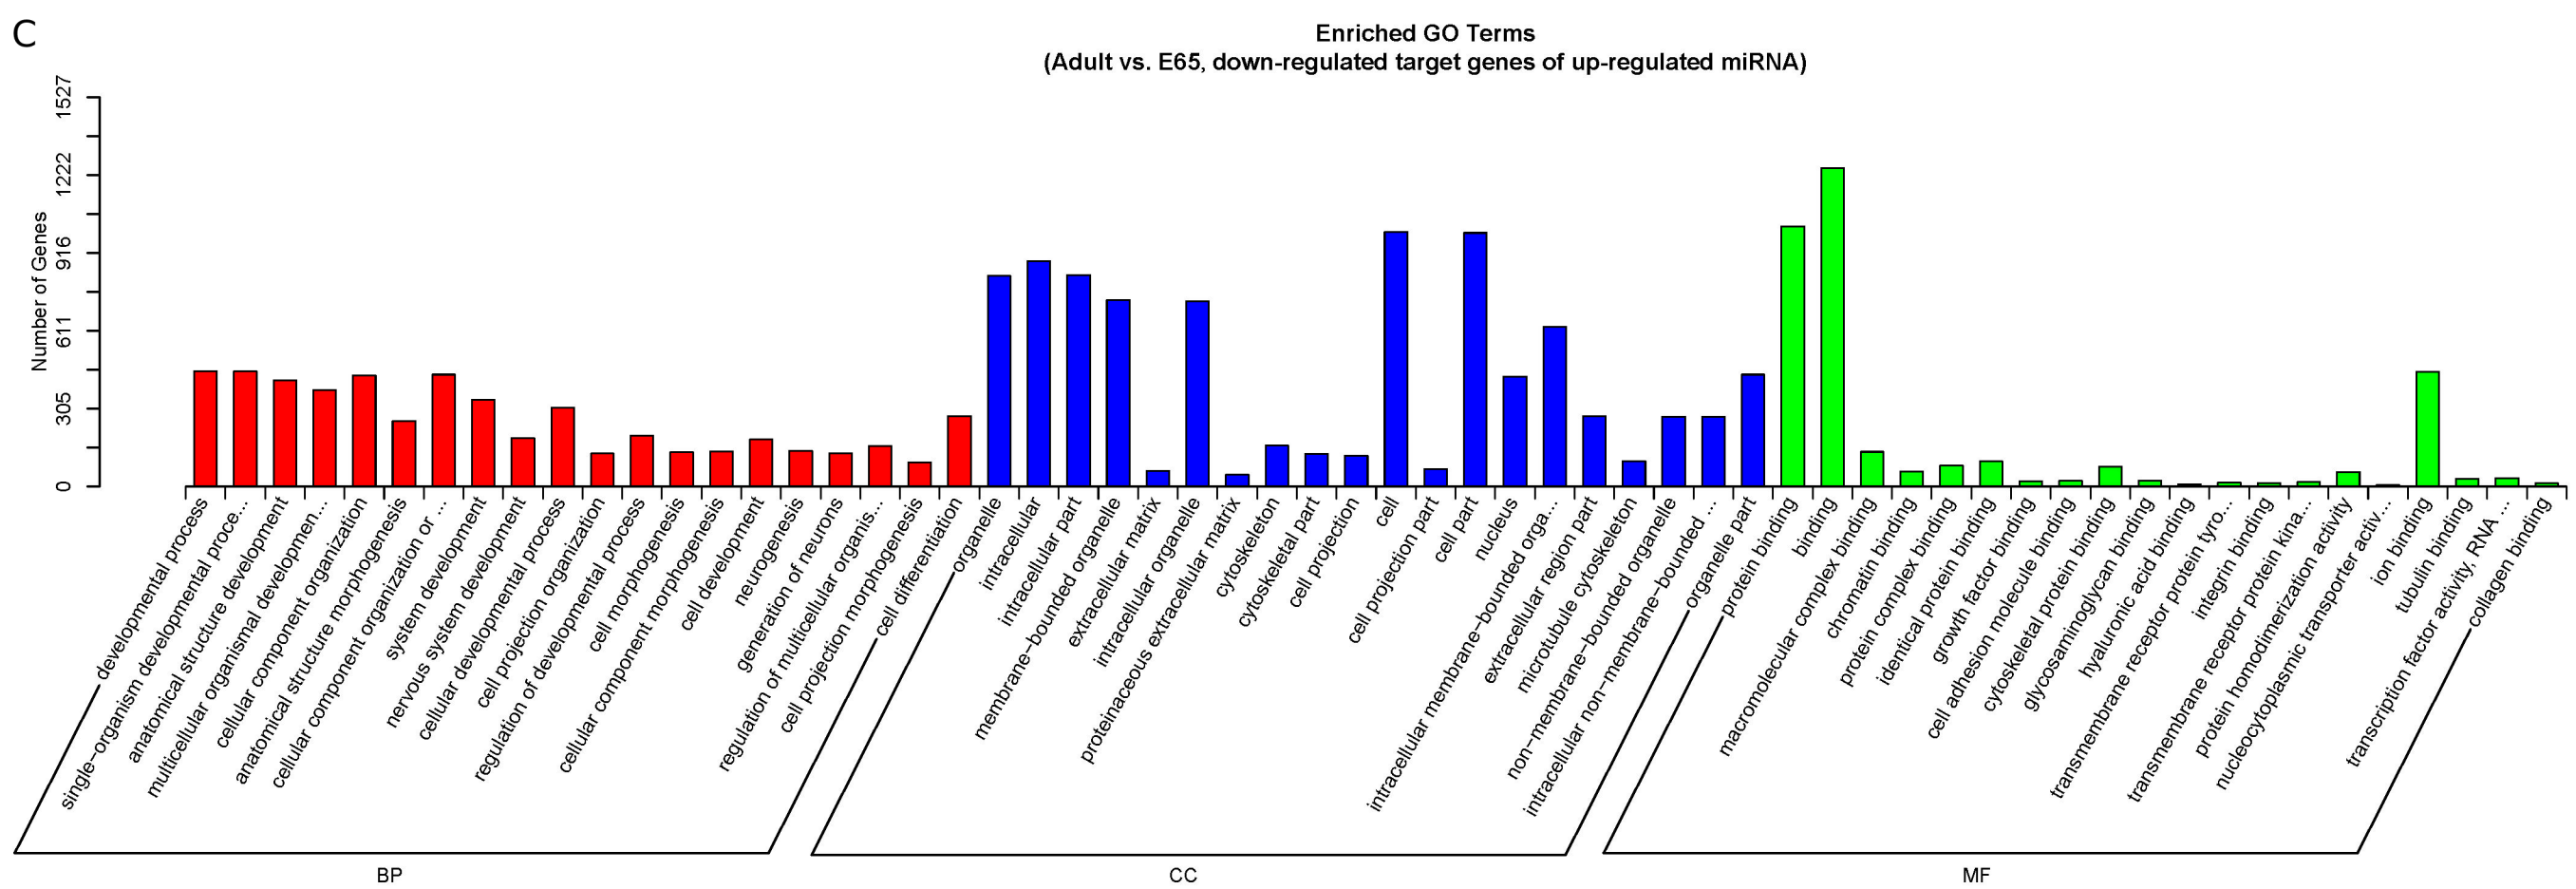

D

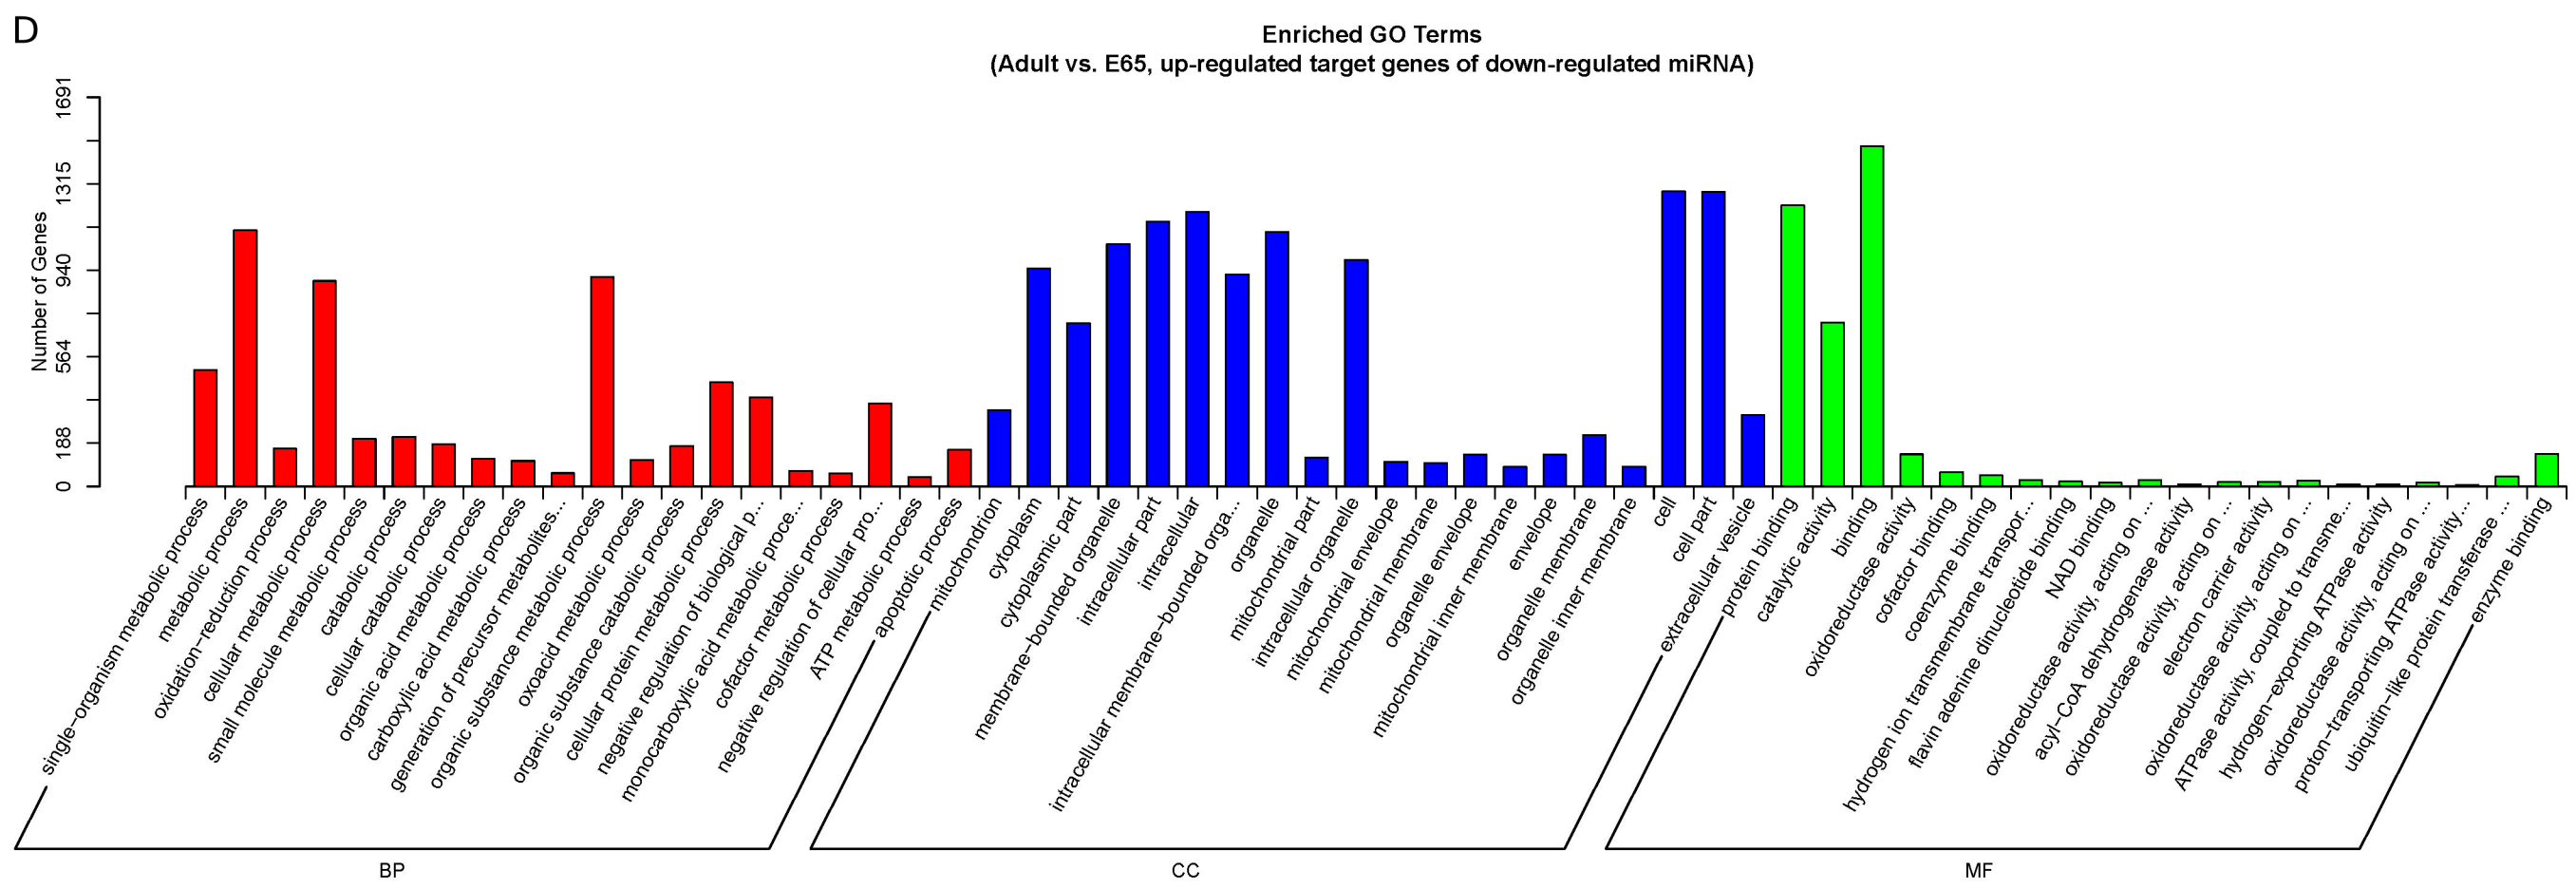

E

Enriched GO Terms  
(Adult vs. Natal, down-regulated target genes of up-regulated miRNA)

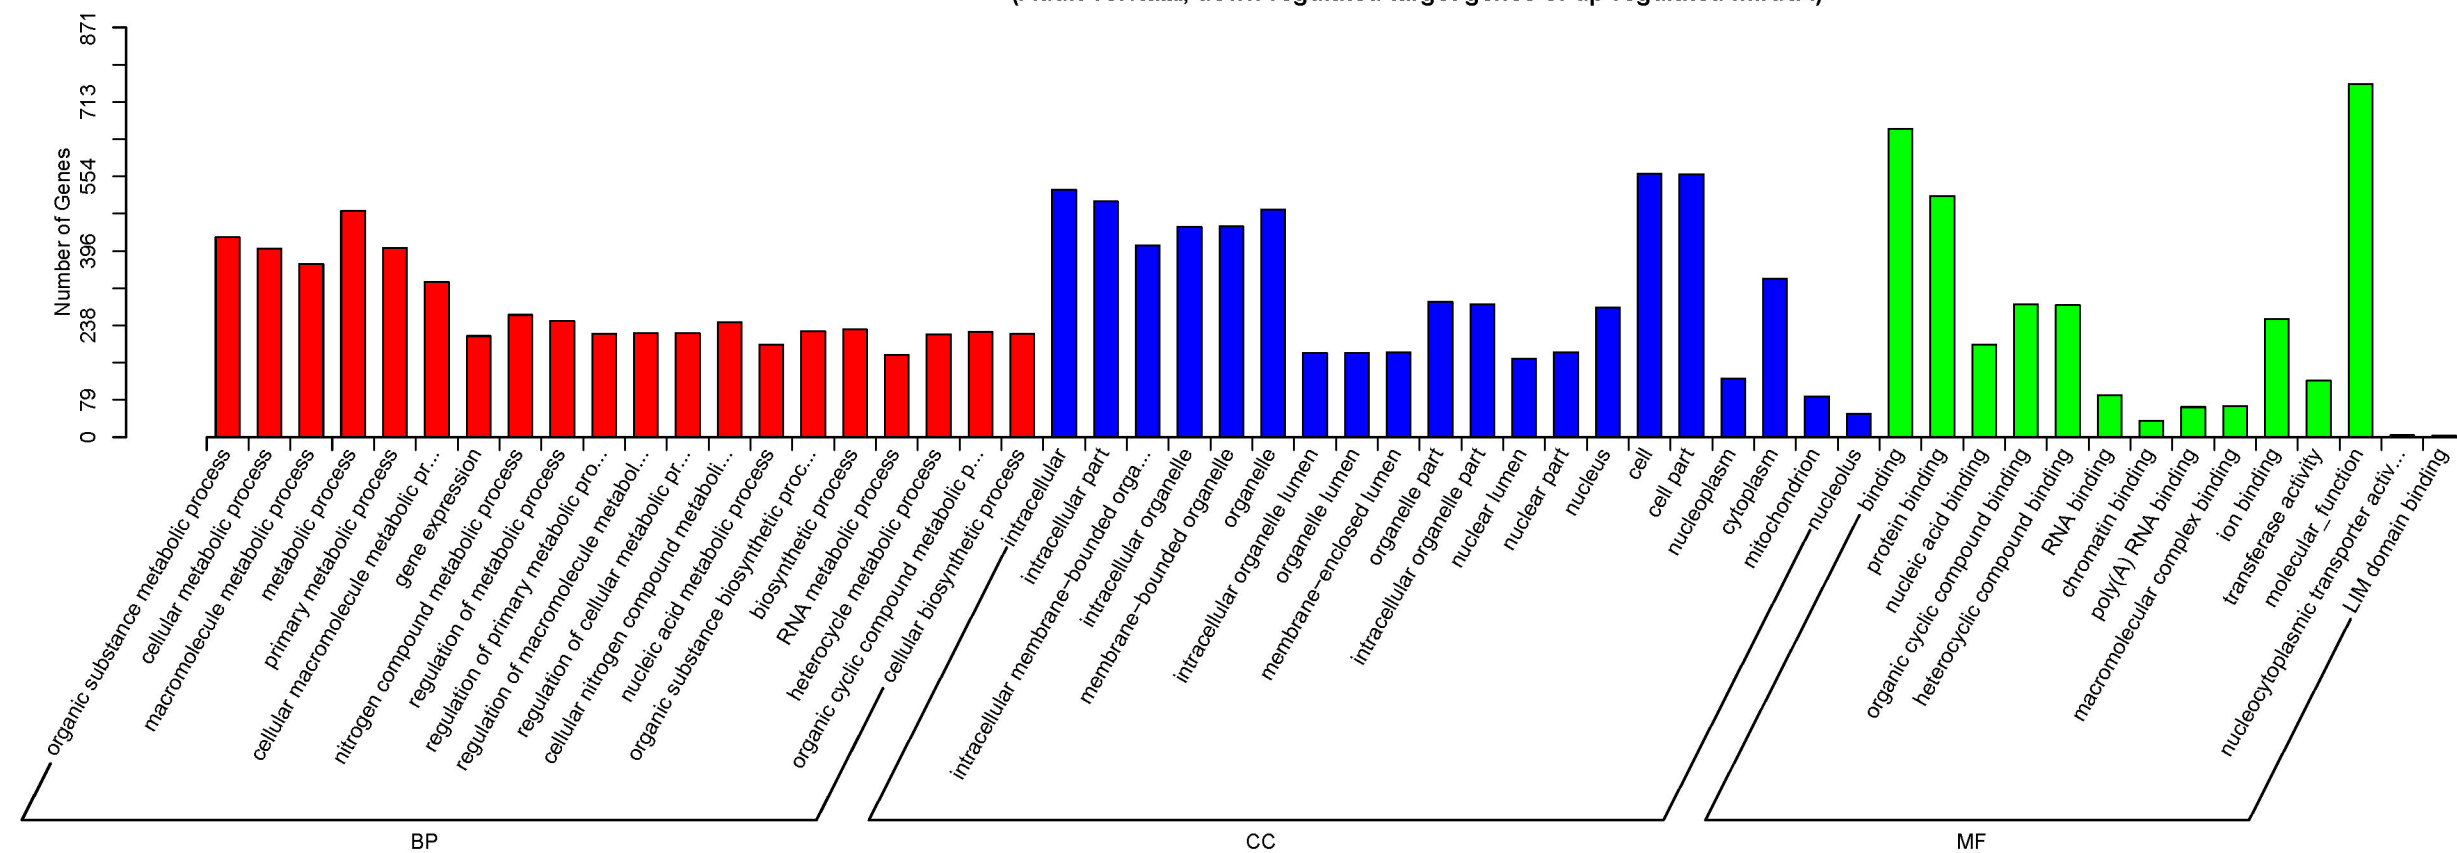

F

Enriched GO Terms  
(Adult vs. Natal, up-regulated target genes of down-regulated miRNA)

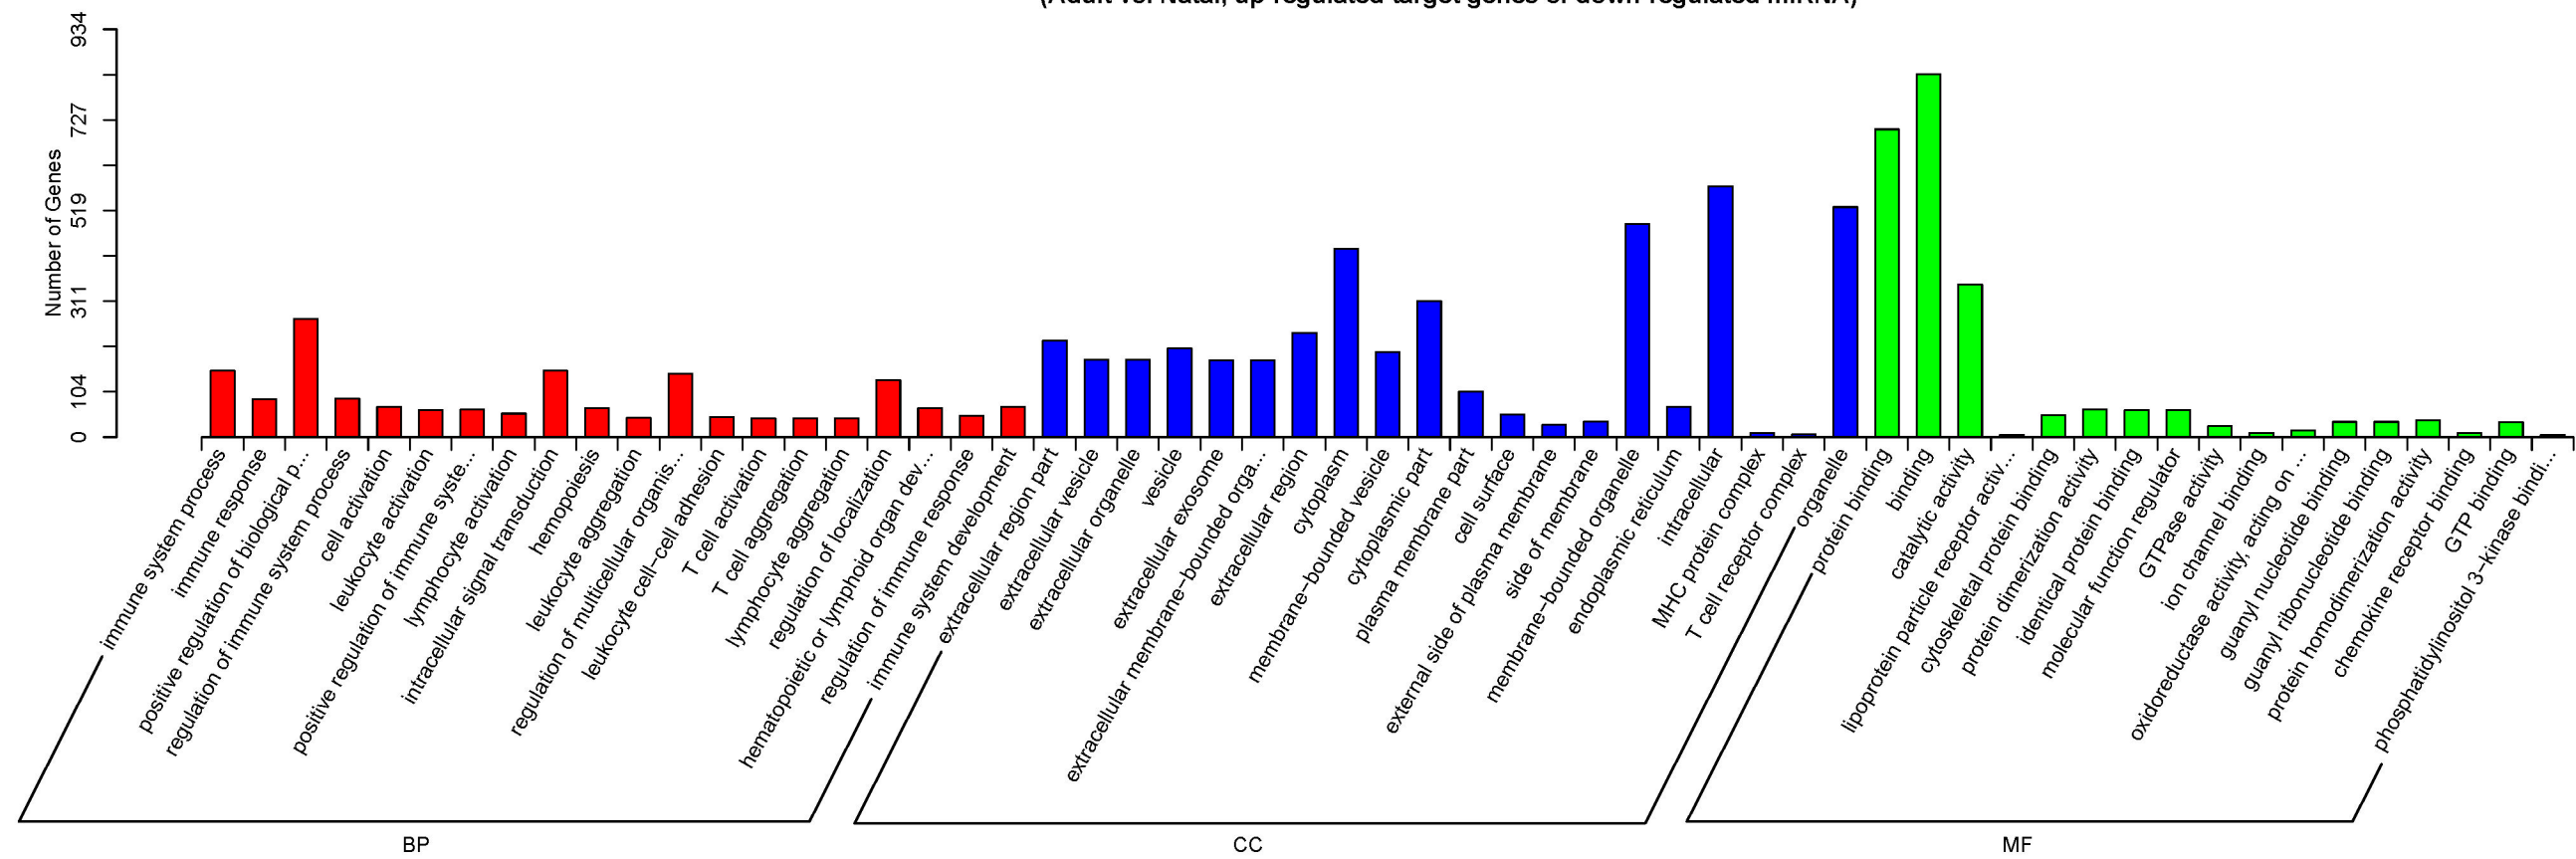

Supplement: s1 [file s1]
